# Supplementary material
Source: PubMed Central journal article supplement (PMC7547576)
Supplement: mmc1.pdf [file mmc1.pdf]

**MEDJ, Volume 1**

## **Supplemental Information**

### **A Prediction Model to Prioritize**

### **Individuals for a SARS-CoV-2 Test**

### **Built from National Symptom Surveys**

**Saar Shoer, Tal Karady, Ayya Keshet, Smadar Shilo, Hagai Rossman, Amir Gavrieli, Tomer Meir, Amit Lavon, Dmitry Kolobkov, Iris Kalka, Anastasia Godneva, Ori Cohen, Adam Kariv, Ori Hoch, Mushon Zer-Aviv, Noam Castel, Carole Sudre, Anat Ekka Zohar, Angela Irony, Tim Spector, Benjamin Geiger, Dorit Hizi, Varda Shalev, Ran Balicer, and Eran Segal**

## Supplementary Method

### COVID-19 survey

#### a. Online version questions

Age: \_\_\_\_\_

Gender:

- Male
- Female

City, Street:

I am:

- Feeling well
- Not feeling well

Are you experiencing any of the following symptoms?

Cough

- Dry cough (no sputum)
- Wet cough (with sputum)
- Fatigue
- Muscle pain
- Shortness of breath
- Rhinorrhea (runny nose) and/or nasal congestion
- Diarrhea
- Nausea and/or vomiting
- Sore throat
- Headache
- Chills
- Confusion
- Loss of taste or smell

Have you been diagnosed with any of the following conditions:

- Diabetes mellitus
- Hypertension
- Cardiovascular disease or stroke
- Chronic lung disease including Asthma (with the exception of childhood Asthma)
- Chronic kidney disease
- Malignancy (cancer)
- Immunodeficiency (including consumption of drugs which cause immunodeficiency)

I am currently:

- Not in isolation
- In isolation (including from family members, staying in a separate room) from the date of \_\_\_\_\_ due to:
  - A recent international travel

- A contact with an individual who was infected with coronavirus
- Experiencing disease symptoms
- Voluntary isolation

I have a confirmed infection with COVID-19 (by a lab test) and currently:

- In home isolation
- Staying in a hotel
- Hospitalized in a hospital
- I recovered from COVID-19 infection

Cigarette smoking habits:

- I currently smoke
- I used to smoke and stopped more than 5 years ago
- I used to smoke and stopped less than 5 years ago
- I have never smoked

What is your current body temperature?

- I did not measure my temperature in the last 24 hours
- I measured my temperature and it was \_\_\_\_\_

How many individuals have you been in contact with in the last 24 hours?

(within approximately 2 meters (6 ft 7 in) for more than 15 minutes)

Adults (age above 18 years old \_\_\_\_\_)

Children (age below 18 years old \_\_\_\_\_)

**b. IVR version questions**

Age group:

- 0-20
- 21-30
- 31-40
- 41-50
- 51-60
- 61-70
- > 70

Gender:

- Male
- Female

Were you confirmed with COVID-19 (by a lab test)?

- Yes
- No

Are you currently in isolation?

- Yes
- No

I am:

- Feeling well
- Not feeling well

Are you experiencing any of the following symptoms?

- Sore throat
- Cough
- Shortness of breath
- Loss of taste or smell

Did you measure your body temperature today?

- No
- Yes:
  - I had a fever (body temperature >38°C)
  - I did not have a fever (body temperature <38°C)

Have you been diagnosed with any of the following conditions: Diabetes mellitus, Hypertension, Cardiovascular disease, Chronic lung disease, Chronic kidney disease, Malignancy (cancer) or Immunodeficiency?

- Yes
- No

Are you currently staying at your own home?

- Yes
- No

## Supplementary Figures

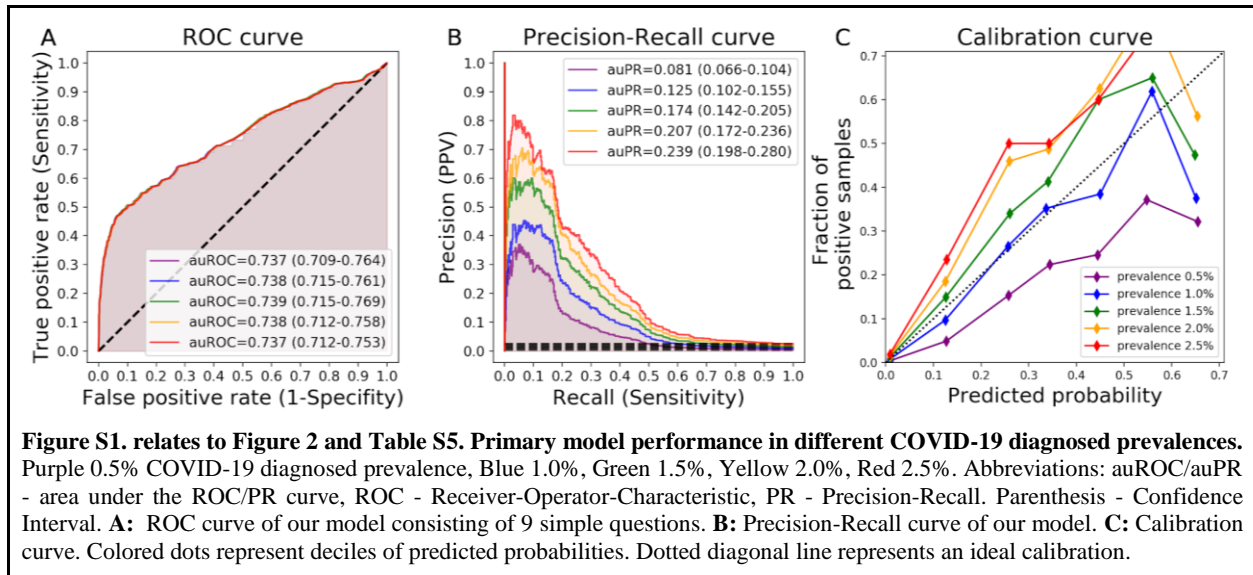

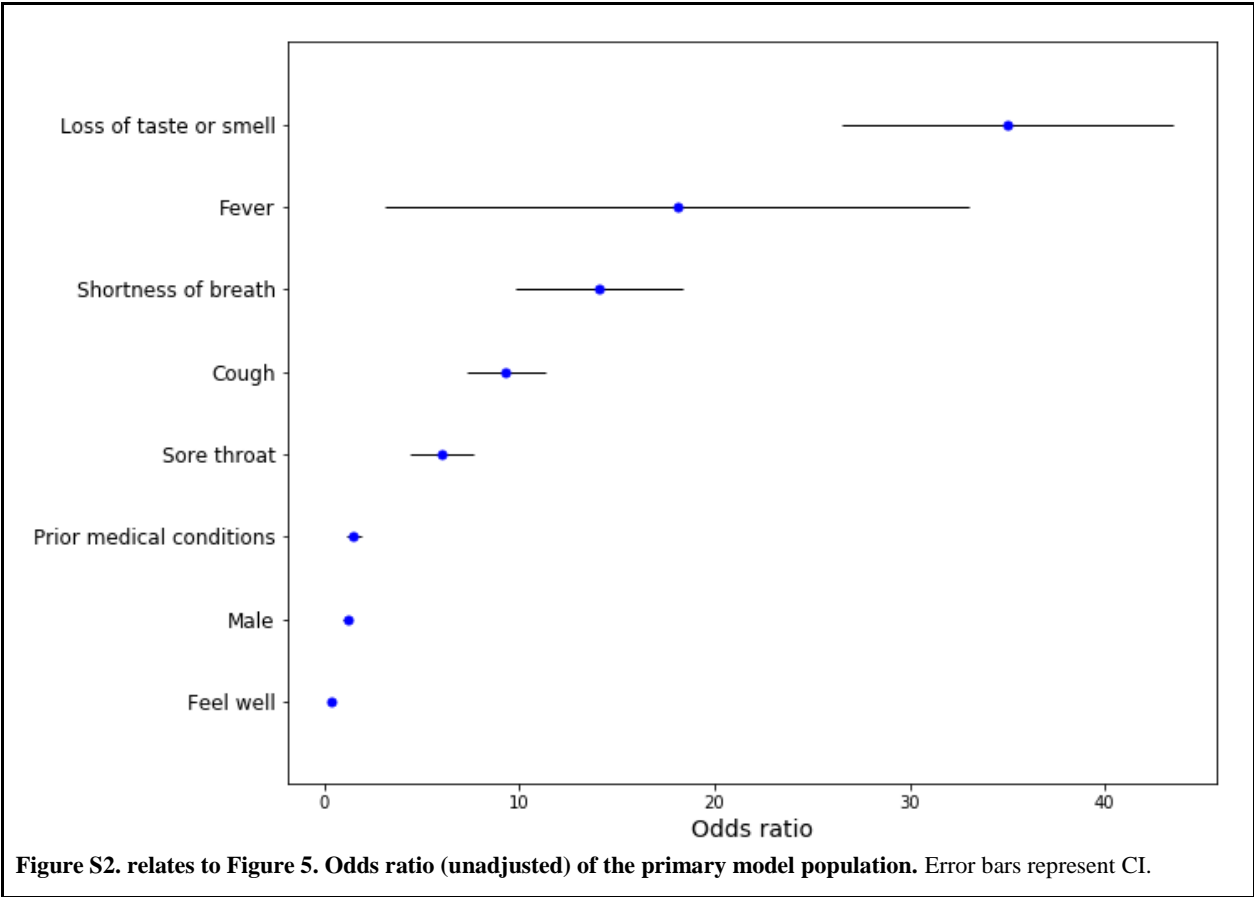

## Supplementary Tables

**Table S1, relates to Figure 1. COVID-19 diagnosis prevalence and response rate in the IVR cities**

| City            | Total population* | Target population* (age > 20 years) | Number of COVID-19 diagnosed individuals# | COVID-19 diagnosis prevalence | Number of responders | Response rate |
|-----------------|-------------------|-------------------------------------|-------------------------------------------|-------------------------------|----------------------|---------------|
| HAZOR HAGELILIT | 9K                | 6K                                  | 3                                         | 0.03%                         | 1428                 | 15.58%        |
| NETIVOT         | 36K               | 20K                                 | 89                                        | 0.25%                         | 4462                 | 12.52%        |
| ZEFAT           | 36K               | 20K                                 | 66                                        | 0.18%                         | 3935                 | 11.02%        |
| EL'AD           | 48K               | 18K                                 | 371                                       | 0.78%                         | 3924                 | 8.20%         |
| IMMANU'EL       | 4K                | 2K                                  | not published                             | not published                 | 239                  | 6.47%         |
| LOD             | 76K               | 48K                                 | 86                                        | 0.11%                         | 4789                 | 6.32%         |
| REKHASIM        | 12K               | 6K                                  | 37                                        | 0.31%                         | 754                  | 6.23%         |
| BENE BERAQ      | 199K              | 96K                                 | 2747                                      | 1.38%                         | 12335                | 6.20%         |
| BET SHEMESH     | 119K              | 54K                                 | 436                                       | 0.37%                         | 7152                 | 6.03%         |

\* Number of residents in each city and age group are according to the Israeli Central Bureau of Statistics for 2018.

# Number of COVID-19 diagnosed individuals is according to the Israeli Ministry of Health on April 26, 2020.

**Table S2, relates to Figure 1. Baseline characteristics of the extended features model population**

| <b>Characteristic,<br/>mean (SD) or %</b> | <b>All individuals<br/>n=131,166 (100%)</b> | <b>COVID-19<br/>undiagnosed<br/>n=131,052<br/>(99.913%)</b> | <b>COVID-19<br/>diagnosed<br/>n=114 (0.087%)</b> |
|-------------------------------------------|---------------------------------------------|-------------------------------------------------------------|--------------------------------------------------|
| Age in years                              | 48.479 (15.836)                             | 48.485 (15.836)                                             | 41.842 (15.011)                                  |
| Gender - male                             | 58,545 (44.634%)                            | 58,484 (44.627%)                                            | 61 (53.509%)                                     |
| COVID-19 diagnosed                        | 114 (0.087%)                                | 0 (0.0%)                                                    | 114 (100.0%)                                     |
| Diabetes                                  | 9,894 (7.543%)                              | 9,886 (7.544%)                                              | 8 (7.018%)                                       |
| Hypertension                              | 19,959 (15.217%)                            | 19,951 (15.224%)                                            | 8 (7.018%)                                       |
| Ischemic heart disease                    | 6,844 (5.218%)                              | 6,843 (5.222%)                                              | 1 (0.877%)                                       |
| Lung disease                              | 6,712 (5.117%)                              | 6,710 (5.12%)                                               | 2 (1.754%)                                       |
| Kidney disease                            | 801 (0.611%)                                | 800 (0.61%)                                                 | 1 (0.877%)                                       |
| Cancer                                    | 6,050 (4.612%)                              | 6,046 (4.613%)                                              | 4 (3.509%)                                       |
| Immune system suppression                 | 2,658 (2.026%)                              | 2,658 (2.028%)                                              | 0 (0.0%)                                         |
| Feeling well                              | 124,961 (95.269%)                           | 124,864 (95.278%)                                           | 97 (85.088%)                                     |
| Shortness of breath                       | 1,667 (1.271%)                              | 1,659 (1.266%)                                              | 8 (7.018%)                                       |
| Runny nose                                | 6,932 (5.285%)                              | 6,924 (5.283%)                                              | 8 (7.018%)                                       |
| Fatigue                                   | 5,839 (4.452%)                              | 5,807 (4.431%)                                              | 32 (28.07%)                                      |
| Nausea or vomiting                        | 889 (0.678%)                                | 885 (0.675%)                                                | 4 (3.509%)                                       |
| Muscle pain                               | 1,201 (0.916%)                              | 1,194 (0.911%)                                              | 7 (6.14%)                                        |
| Sore throat                               | 5,092 (3.882%)                              | 5,079 (3.876%)                                              | 13 (11.404%)                                     |
| Cough dry                                 | 4,581 (3.493%)                              | 4,557 (3.477%)                                              | 24 (21.053%)                                     |
| Cough moist                               | 4,821 (3.675%)                              | 4,814 (3.673%)                                              | 7 (6.14%)                                        |
| Diarrhea                                  | 1,698 (1.295%)                              | 1,692 (1.291%)                                              | 6 (5.263%)                                       |
| Fever<br>(body temperature above 38 °C)   | 243 (0.185%)                                | 237 (0.181%)                                                | 6 (5.263%)                                       |
| Chills                                    | 954 (0.727%)                                | 948 (0.723%)                                                | 6 (5.263%)                                       |
| Confusion                                 | 399 (0.304%)                                | 397 (0.303%)                                                | 2 (1.754%)                                       |
| Loss of taste or smell                    | 520 (0.396%)                                | 488 (0.372%)                                                | 32 (28.07%)                                      |



**Table S3, relates to Figure 2. Prediction models area under the curve of the Main dataset**

|                                  | Primary model           |                         | Extended features model |                         |
|----------------------------------|-------------------------|-------------------------|-------------------------|-------------------------|
|                                  | auROC                   | auPR                    | auROC                   | auPR                    |
| Logistic Regression              |                         |                         |                         |                         |
| Baseline model                   | 0.556 (CI: 0.527-0.581) | 0.013 (CI: 0.012-0.015) | 0.613 (CI: 0.560-0.654) | 0.001 (CI: 0.001-0.002) |
| Full model                       | 0.737 (CI: 0.712-0.759) | 0.144 (CI: 0.119-0.177) | 0.767 (CI: 0.724-0.811) | 0.030 (CI: 0.018-0.047) |
| Gradient Boosting Decision Trees |                         |                         |                         |                         |
| Baseline model                   | 0.553 (CI: 0.530-0.585) | 0.015 (CI: 0.013-0.017) | 0.606 (CI: 0.545-0.645) | 0.001 (CI: 0.001-0.002) |
| Full model                       | 0.700 (CI: 0.668-0.728) | 0.150 (CI: 0.125-0.187) | 0.709 (CI: 0.630-0.774) | 0.047 (CI: 0.025-0.088) |

Abbreviations: auROC/auPR - area under the ROC/PR curve, ROC - Receiver-Operator-Characteristic, PR - Precision-Recall.

**Table S4, relates to Figures 2, 4. Prediction models precision, recall and NPV in different decision probability thresholds**

| Decision probability thresholds | Logistic Regression Israeli dataset |          |          | Gradient Boosting Decision Trees Israeli dataset |          |          | Logistic Regression U.S., U.K. and Sweden dataset |          |          |
|---------------------------------|-------------------------------------|----------|----------|--------------------------------------------------|----------|----------|---------------------------------------------------|----------|----------|
|                                 | Precision                           | Recall   | NPV      | Precision                                        | Recall   | NPV      | Precision                                         | Recall   | NPV      |
| 0                               | 0.011391                            | 1.000000 | 1.000000 | 0.011382                                         | 1.000000 | 1.000000 | 0.065332                                          | 1.000000 | 1.000000 |
| 0.1                             | 0.225989                            | 0.240964 | 0.991253 | 0.195620                                         | 0.269076 | 0.991548 | 0.294324                                          | 0.234899 | 0.947265 |
| 0.2                             | 0.398104                            | 0.168675 | 0.990514 | 0.369748                                         | 0.176707 | 0.990578 | 0.363760                                          | 0.149329 | 0.942893 |
| 0.3                             | 0.447368                            | 0.136546 | 0.990159 | 0.445161                                         | 0.138554 | 0.990160 | 0.357309                                          | 0.086130 | 0.939340 |
| 0.4                             | 0.485149                            | 0.098394 | 0.989713 | 0.564103                                         | 0.088353 | 0.989605 | 0.358491                                          | 0.053132 | 0.937535 |
| 0.5                             | 0.507692                            | 0.066265 | 0.989401 | 0.630435                                         | 0.058233 | 0.989269 | 0.504274                                          | 0.032998 | 0.936553 |
| 0.6                             | 0.500000                            | 0.042169 | 0.989155 | 0.625000                                         | 0.020080 | 0.988842 | 0.576271                                          | 0.019016 | 0.935772 |
| 0.7                             | 0.500000                            | 0.022088 | 0.988886 | 0.250000                                         | 0.002008 | 0.988639 | 0.789474                                          | 0.008389 | 0.935171 |
| 0.8                             | 0.285714                            | 0.004016 | 0.988706 | 0.000000                                         | 0.000000 | 0.988617 | 1.000000                                          | 0.002237 | 0.934805 |

**Table S5, relates to Figure S1. Primary model precision, recall and NPV in different decision probability thresholds and in different COVID-19 diagnosed prevalences**

| <b>COVID-19 prevalence</b>             | <b>0.5%</b>      |               |            | <b>1.0%</b>      |               |            | <b>1.5%</b>      |               |            | <b>2.0%</b>      |               |            | <b>2.5%</b>      |               |            |
|----------------------------------------|------------------|---------------|------------|------------------|---------------|------------|------------------|---------------|------------|------------------|---------------|------------|------------------|---------------|------------|
| <b>Decision probability thresholds</b> | <b>Precision</b> | <b>Recall</b> | <b>NPV</b> |
| 0                                      | 0.0050           | 1.0000        | 1.0000     | 0.0100           | 1.0000        | 1.0000     | 0.0150           | 1.0000        | 1.0000     | 0.0200           | 1.0000        | 1.0000     | 0.0250           | 1.0000        | 1.0000     |
| 0.1                                    | 0.1099           | 0.2410        | 0.9962     | 0.1990           | 0.2410        | 0.9923     | 0.2857           | 0.2410        | 0.9885     | 0.3499           | 0.2410        | 0.9846     | 0.4096           | 0.2410        | 0.9808     |
| 0.2                                    | 0.2366           | 0.1687        | 0.9958     | 0.3636           | 0.1687        | 0.9917     | 0.4670           | 0.1707        | 0.9875     | 0.5638           | 0.1687        | 0.9833     | 0.5944           | 0.1707        | 0.9791     |
| 0.3                                    | 0.2776           | 0.1365        | 0.9957     | 0.4048           | 0.1365        | 0.9914     | 0.5231           | 0.1365        | 0.9870     | 0.6018           | 0.1365        | 0.9827     | 0.6355           | 0.1365        | 0.9784     |
| 0.4                                    | 0.3063           | 0.0984        | 0.9955     | 0.4298           | 0.0984        | 0.9910     | 0.5833           | 0.0984        | 0.9865     | 0.6622           | 0.0984        | 0.9819     | 0.7101           | 0.0984        | 0.9774     |
| 0.5                                    | 0.3367           | 0.0663        | 0.9953     | 0.4533           | 0.0683        | 0.9907     | 0.5763           | 0.0683        | 0.9861     | 0.6800           | 0.0683        | 0.9814     | 0.7727           | 0.0683        | 0.9768     |
| 0.6                                    | 0.3281           | 0.0422        | 0.9952     | 0.3889           | 0.0422        | 0.9905     | 0.5385           | 0.0422        | 0.9857     | 0.6176           | 0.0422        | 0.9809     | 0.7778           | 0.0422        | 0.9762     |
| 0.7                                    | 0.2973           | 0.0221        | 0.9951     | 0.3667           | 0.0221        | 0.9903     | 0.5500           | 0.0221        | 0.9854     | 0.5500           | 0.0221        | 0.9805     | 0.7333           | 0.0221        | 0.9757     |
| 0.8                                    | 0.1250           | 0.0040        | 0.9950     | 0.1429           | 0.0040        | 0.9901     | 0.3333           | 0.0040        | 0.9851     | 0.4000           | 0.0040        | 0.9802     | 0.4000           | 0.0040        | 0.9753     |

**Table S6, relates to Figure 5. Primary model feature importance**

|                          | <b>Mean absolute<br/>Shapley value</b> | <b>Odds-ratio</b> |
|--------------------------|----------------------------------------|-------------------|
| Loss of taste or smell   | 0.051686                               | 35.011023         |
| Cough                    | 0.050932                               | 9.311583          |
| Age                      | 0.01556                                |                   |
| Shortness of breath      | 0.014809                               | 14.07521          |
| Sore throat              | 0.011866                               | 6.054205          |
| Male                     | 0.008462                               | 1.199557          |
| Feel well                | 0.001609                               | 0.406353          |
| Prior medical conditions | 0.001331                               | 1.53291           |
| Fever                    | 0.000326                               | 18.088595         |
